# Supplementary material for: One-step solvent-free synthesis of carbon dot-based layered composites exhibiting color-tunable photoluminescence
Source: Royal Society of Chemistry journal article supplement (doi:10.1039/d2ra00312k), 2022-01-01
Supplement: d2ra00312k1.pdf [file d2ra00312k1.pdf]

## Supporting Information

### **One-step solvent-free synthesis of carbon dot-based layered composites exhibiting color-tunable photoluminescence**

Junya Uchida,\*<sup>‡</sup> Yuka Takahashi, Takumi Katsurao and Hiroshi Sakabe

*Advanced Research Department, Kureha Corporation, Ochiai, Nishiki-Machi, Iwaki, Fukushima 974-8686, Japan*

<sup>‡</sup> Present address: Department of Chemistry and Biotechnology, School of Engineering, The University of Tokyo, Hongo, Bunkyo-ku, Tokyo 113-8656, Japan

E-mail: j\_uchida@chembio.t.u-tokyo.ac.jp

**Table of contents:**

|                                                                                 |            |
|---------------------------------------------------------------------------------|------------|
| <b>1. Thermal properties of the carbon dot/saponite composites -----</b>        | <b>S3</b>  |
| <b>2. Hybrid structures of the carbon dot/saponite composites -----</b>         | <b>S4</b>  |
| <b>3. Photophysical properties of the carbon dot/saponite composites -----</b>  | <b>S8</b>  |
| <b>4. X-ray photoelectron spectroscopy (XPS) study of the carbon dots -----</b> | <b>S10</b> |
| <b>5. UV-vis absorption properties of the carbon dots -----</b>                 | <b>S11</b> |

## 1. Thermal properties of the carbon dot/saponite composites

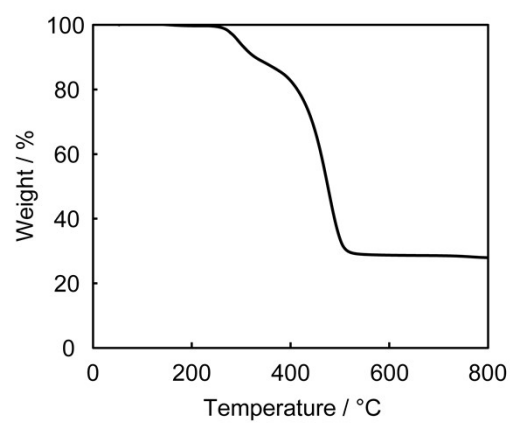

**Fig. S1** Thermogravimetric curve of the **P-CD1(71)**/saponite composite.

## 2. Hybrid structures of the carbon dot/saponite composites

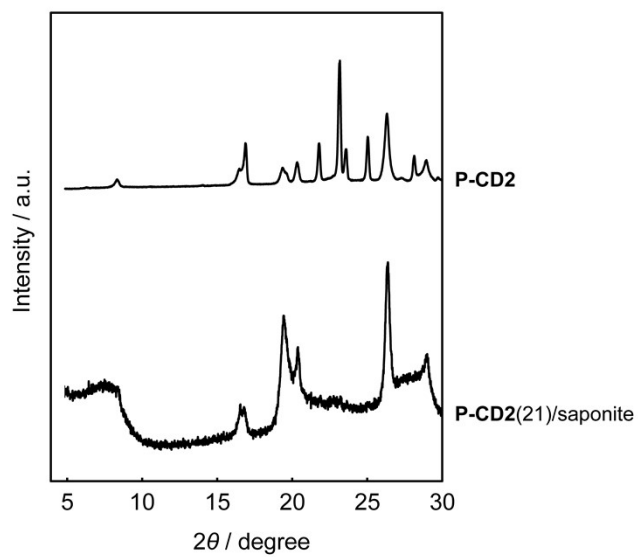

**Fig. S2** X-ray diffraction patterns of **P-CD2** and the **P-CD2(21)/saponite** composite.

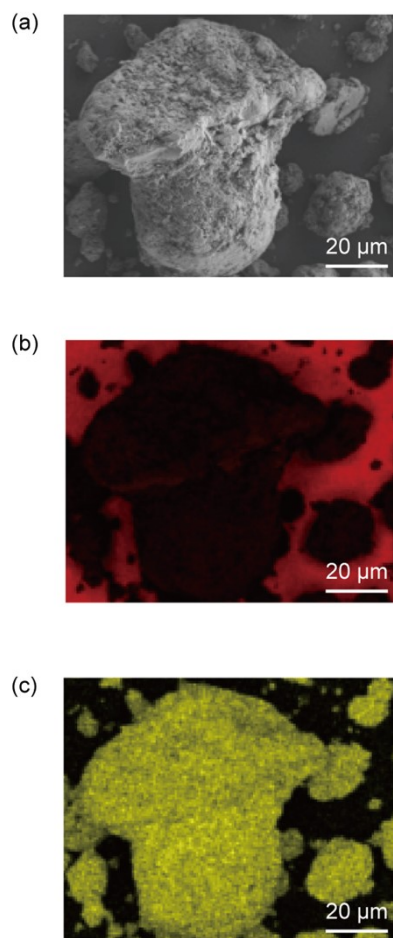

**Fig. S3** Comparison of (a) scanning electron microscope (SEM) image with (b) C and (c) Si mapping of the surface of the **P-CD1(21)/saponite** composite.

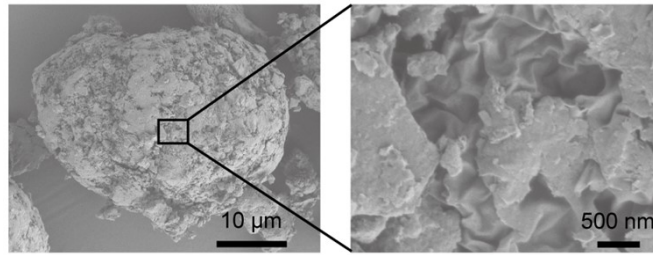

**Fig. S4** SEM images of saponite used in this study.

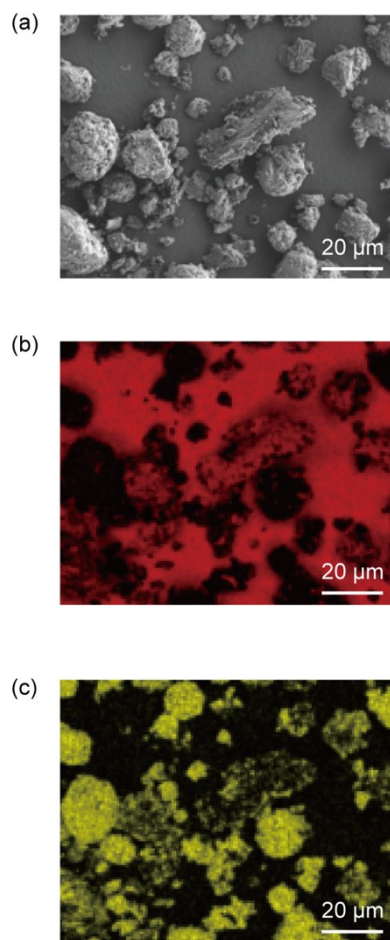

**Fig. S5** Comparison of (a) SEM image with (b) C and (c) Si mapping of the surface of the P-CD2(21)/saponite composite.

### 3. Photophysical properties of the carbon dot/saponite composites

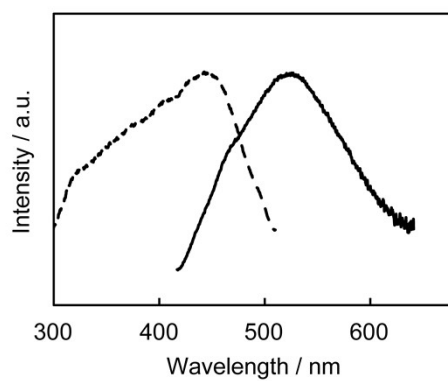

**Fig. S6** Normalized excitation (dashed line) and emission spectra (solid line) of the **P-CD1(10)**/saponite composite ( $\lambda_{em} = 525$  nm,  $\lambda_{ex} = 400$  nm) in the solid states.



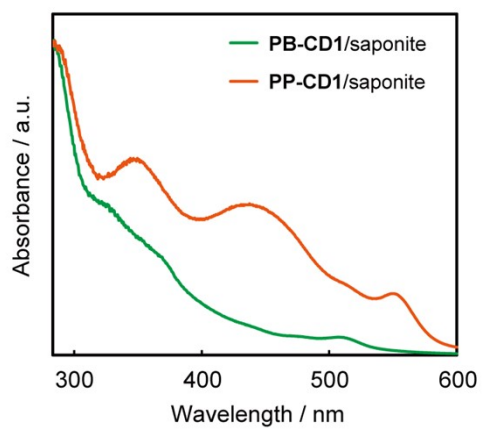

**Fig. S7** UV-vis absorption spectra of the **PB-CD1/saponite** and **PP-CD1/saponite** composites.

#### 4. X-ray photoelectron spectroscopy (XPS) study of the carbon dots

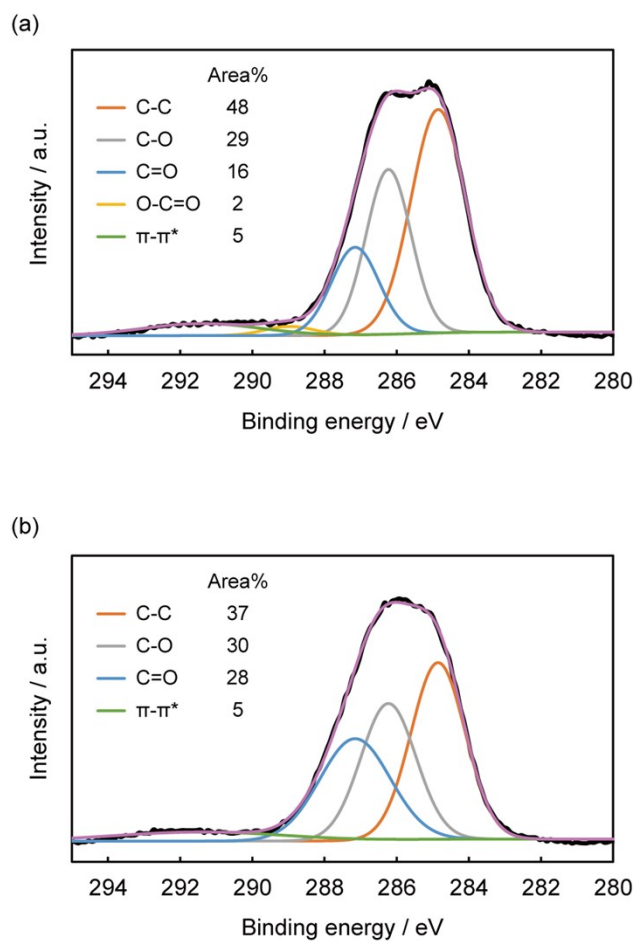

**Fig. S8** XPS analysis of the C 1s region for (a) **P-CD1** and (b) **P-CD2**.

## 5. UV-vis absorption properties of the carbon dots

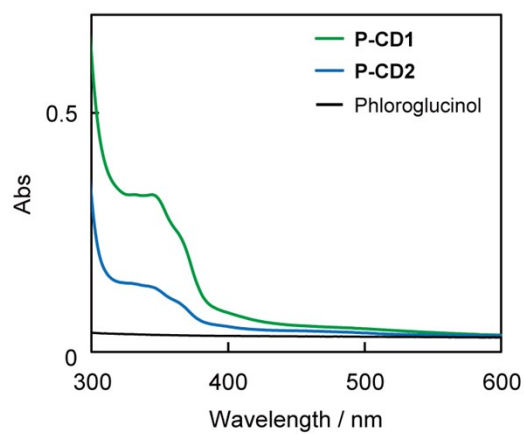

**Fig. S9** UV-vis absorption spectra of **P-CD1**, **P-CD2**, and phloroglucinol in methanol solution ( $0.1 \text{ g L}^{-1}$ ).
